# Supplementary material for: Merge-based syntax is mediated by distinct neurocognitive mechanisms: A clustering analysis of comprehension abilities in 84,000 individuals with language deficits across nine languages
Source: Research Square preprint supplement (doi:10.21203/rs.3.rs-7294415/v1), 2025-09-17
Supplement: Supplementary file 1 [file 182f35260d7951237f042e2b.docx]

# Supplementary Material

Supplementary Table 1: Autism Treatment Evaluation Checklist (ATEC) 1, subscale 1:Speech/Language/Communication. The answers choices were: not true, somewhat true, very true.

| **1. Knows own name** |
| --- |
| **2. Responds to ‘No’ or ‘Stop’** |
| **3. Can follow some commands** |
| 4. Can use one word at a time (No!, Eat, Water, etc.) |
| 5. Can use 2 words at a time (Don't want, Go home) |
| 6. Can use 3 words at a time (Want more milk) |
| 7. Knows 10 or more words |
| 8. Can use sentences with 4 or more words |
| 9. Explains what he/she wants |
| 10. Asks meaningful questions |
| 11. Speech tends to be meaningful/relevant |
| 12. Often uses several successive sentences |
| 13. Carries on fairly good conversation |
| 14. Has normal ability to communicate for his/her age |

Supplementary Table 2: ATEC subscale 2:Sociability**.** The answers choices were: not true, somewhat true, very true.

| 1. Seems to be in a shell – you cannot reach him/her |
| --- |
| 2. Ignores other people |
| 3. Pays little or no attention when addressed |
| 4. Uncooperative and resistant |
| 5. No eye contact |
| 6. Prefers to be left alone |
| 7. Shows no affection |
| 8. Fails to greet parents |
| 9. Avoids contact with others |
| 10. Does not imitate |
| 11. Dislikes being held/cuddled |
| 12. Does not share or show |
| 13. Does not wave ‘bye bye’ |
| 14. Disagreeable/not compliant |
| 15. Temper tantrums |
| 16. Lacks friends/companions |
| 17. Rarely smiles |
| 18. Insensitive to other's feelings |
| 19. Indifferent to being liked |
| 20. Indifferent if parent(s) leave |

Supplementary Table 3: ATEC subscale 3: Sensory/Cognitive awareness**.** The answers choices were: not true, somewhat true, very true.

| 1. Responds to own name |
| --- |
| **2. Responds to praise** |
| 3. Looks at people and animals |
| 4. Looks at pictures (and T.V.) |
| 5. Does drawing, coloring, art |
| 6. Plays with toys appropriately |
| 7. Appropriate facial expression |
| 8. Understands stories on T.V. |
| 9. Understands explanations |
| 10. Aware of environment |
| 11. Aware of danger |
| 12. Shows imagination |
| 13. Initiates activities |
| 14. Dresses self |
| 15. Curious, interested |
| 16. Venturesome - explores |
| 17. “Tuned in” — Not spacey |
| 18. Looks where others are looking |

Supplementary Table 4: ATEC subscale 4: Health/Physical/Behavior**.** The answers choices were: not a problem, minor problem, moderate problem, and serious problem.

| 1. Bed-wetting |
| --- |
| 2. Wets pants/diapers |
| 3. Soils pants/diapers |
| 4. Diarrhea |
| 5. Constipation |
| 6. Sleep problems |
| 7. Eats too much/too little |
| 8. Extremely limited diet |
| 9. Hyperactive |
| 10. Lethargic |
| 11. Hits or injures self |
| 12. Hits or injures others |
| 13. Destructive |
| 14. Sound-sensitive |
| 15. Anxious/fearful |
| 16. Unhappy/crying |
| 17. Seizures |
| 18. Obsessive speech |
| 19. Rigid routines |
| 20. Shouts or screams |
| 21. Demands sameness |
| 22. Often agitated |
| 23. Not sensitive to pain |
| 24. “Hooked” or fixated on certain objects/topics |
| 25. Repetitive movements (stimming, rocking, etc.) |

Supplementary Table 5: Mental Synthesis Evaluation Checklist (MSEC) 2.The answers choices were: not true, somewhat true, very true.

| **1. Understands simple stories that are read aloud** |
| --- |
| **2. Understands elaborate fairy tales that are read aloud (i.e. stories describing FANTASY creatures)** |
| 3. Draws a VARIETY of RECOGNIZABLE images (objects, people, animals, etc.) |
| 4. Can draw a NOVEL image following YOUR description (e.g. a three-headed horse) |
| 5. Engages in a VARIETY of make-believe activities (such as: playing house, playing with toy soldiers, building forts and castles, etc.) |
| **6. Understands some simple modifiers (i.e. green apple vs. red apple or big apple vs. small apple)** |
| **7. Understands several modifiers in a sentence (i.e. small green apple)** |
| **8. Understands size (can select the largest/smallest object out of a collection of objects)** |
| **9. Understands possessive pronouns (i.e. your apple vs. her apple)** |
| **10. Understands spatial prepositions (i.e. put the apple ON TOP of the box vs. INSIDE the box vs. BEHIND the box)** |
| **11. Understands verb tenses (i.e. I will eat an apple vs. I ate an apple)** |
| **12. Understands the change in meaning when the order of words is changed (i.e. understands the difference between 'a cat ate a mouse' vs. 'a mouse ate a cat')** |
| **13. Understands NUMBERS (i.e. two apples vs. three apples)** |
| 14. Can perform simple arithmetic: 2 + 3 = ? |
| 15. Can add larger numbers: 7 + 6 = ? |
| 16. Can perform simple subtraction: 3 – 2 = ? |
| 17. Can subtract larger numbers: 15 – 7 = ? |
| 18. Can perform simple multiplication: 2 × 2 = ? |
| 19. Can multiply larger numbers: 6 × 7 = ? |
| **20. Understands explanations about people, objects or situations beyond the immediate surroundings (e.g., “Mom is walking the dog,” “The snow has turned to water”)** |


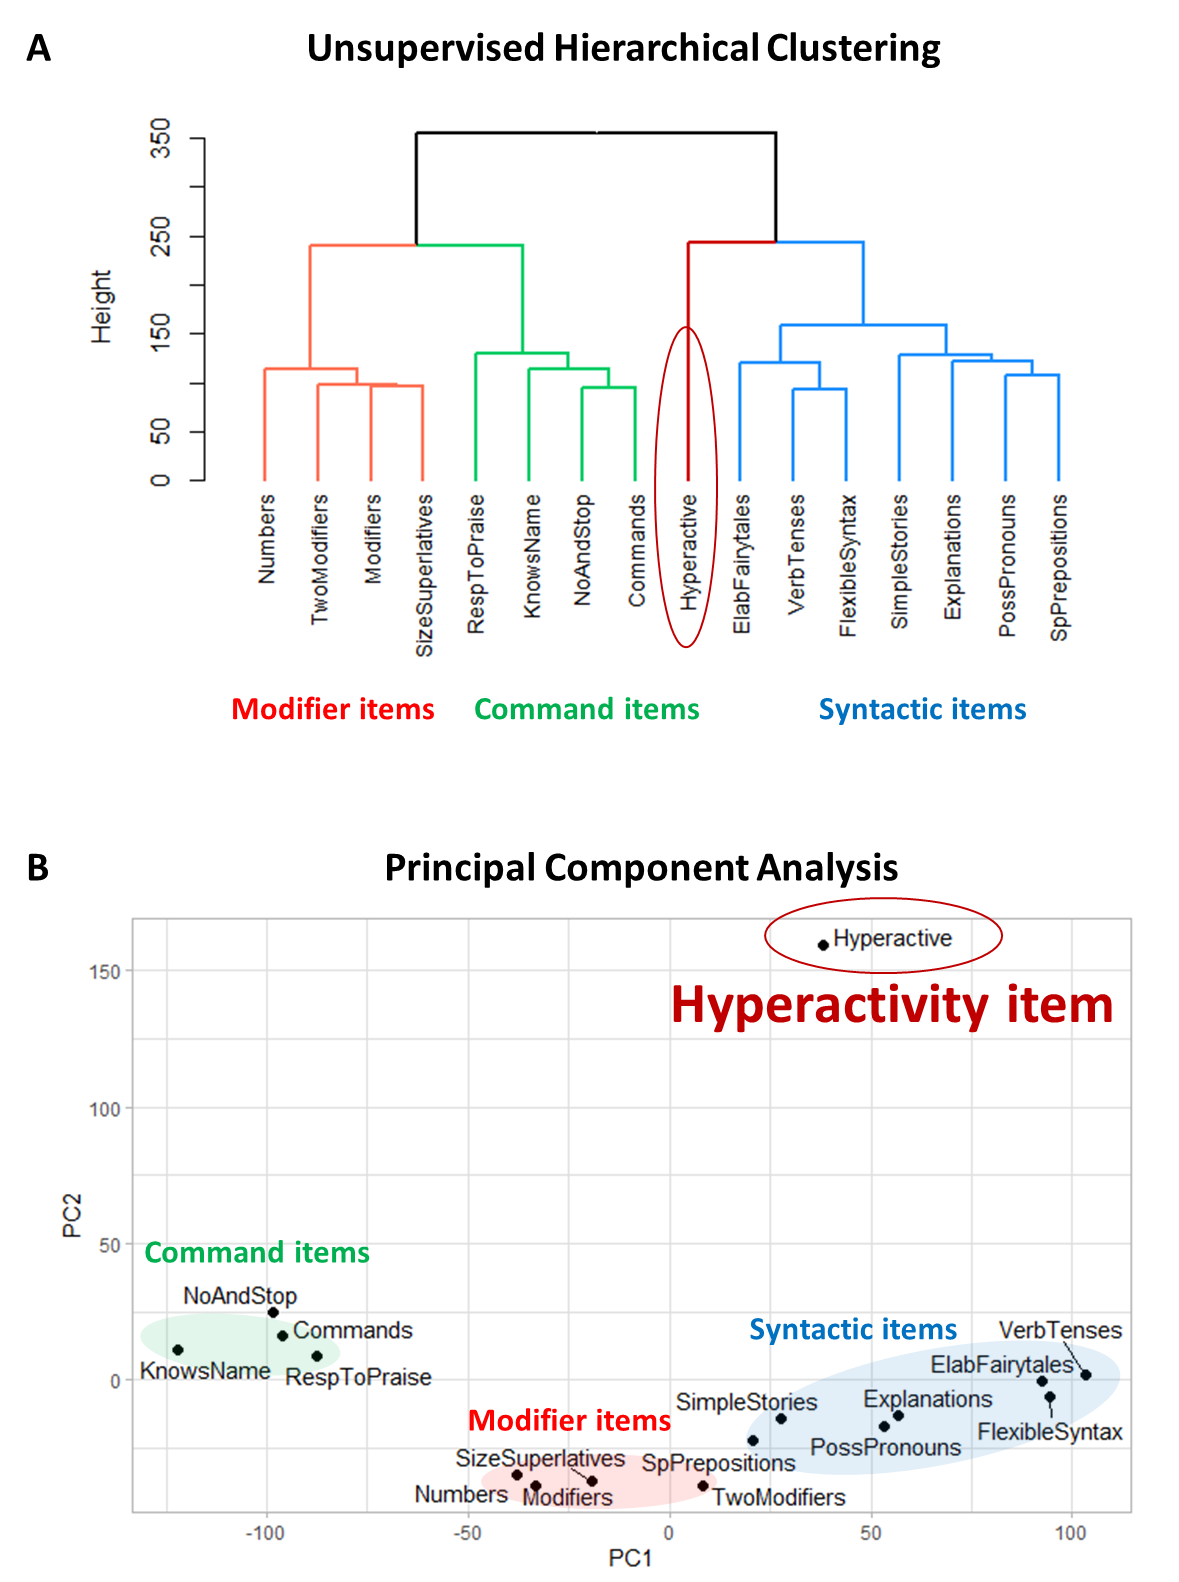

Figure S1. Clustering analysis of 15 language comprehension items with the Hyperactivity item (27,187 English-speaking participants, 4 to 22 years of age) (A) The dendrogram representing the unsupervised hierarchical clustering of language comprehension abilities. (B) Principal component analysis. Principal component 1 accounts for 40.2% of the variance in the data. Principal component 2 accounts for 16.4% of the variance in the data.

Clustering analyses of “hyperactivity” (Figure S1), “bed-wetting” (Figure S2), and “demands sameness” (Figure S3) items provide a valuable opportunity to explore how clustering results can be linked to their underlying neurological substrates.

1. If any two abilities are based on different underlying neurological mechanisms, they could be acquired independently and, therefore, would not co-occur in participants and likely appear in separate clusters.
2. Conversely, if two linguistic abilities were mediated by the same mechanism, they would be expected to co-occur and thus cluster together.

**But what happens when two abilities rely on partially overlapping—but also separable—neural substrates?**

Consider again “hyperactivity” (Figure S1), “bed-wetting” (Figure S2), and “demands sameness” (Figure S2) items. From a neurological perspective, these behaviors are unrelated to language and, accordingly, should cluster separately. As expected, both unsupervised hierarchical clustering analysis and PCA placed these items into a distinct group, at a significant distance from the three language clusters.

Notably, the distances between the centroids of the language clusters were smaller than the distances between each language cluster and the “hyperactivity” item (Figure S1). For example, in the PCA plot, the distance between Hyperactivity and the Command cluster is greater than the distance between the Command and Modifier clusters.

In general, the closer two items are clustered, the more frequently they co-occur in participants, and the more neurological territory they are likely to share. Based on PCA results, we can infer the following hierarchy:

- “**Hyperactivity**” shares the least neurological territory with **language abilities**;
- The **Syntactic Cluster** shares slightly more neurological territory with the **Command Cluster**;
- The **Modifier Cluster** shares even more neurological territory with the **Command Cluster**;
- Within the **Command Cluster**, the four abilities—***knowing the name*, *responding to ‘No’ or ‘Stop’*, *responding to praise*,** and ***following some commands***—share the greatest neurological territory.

Of course, these distance measurements should be interpreted cautiously, as the relationship between spatial distance in clustering or PCA and actual neurological overlap is nonlinear.


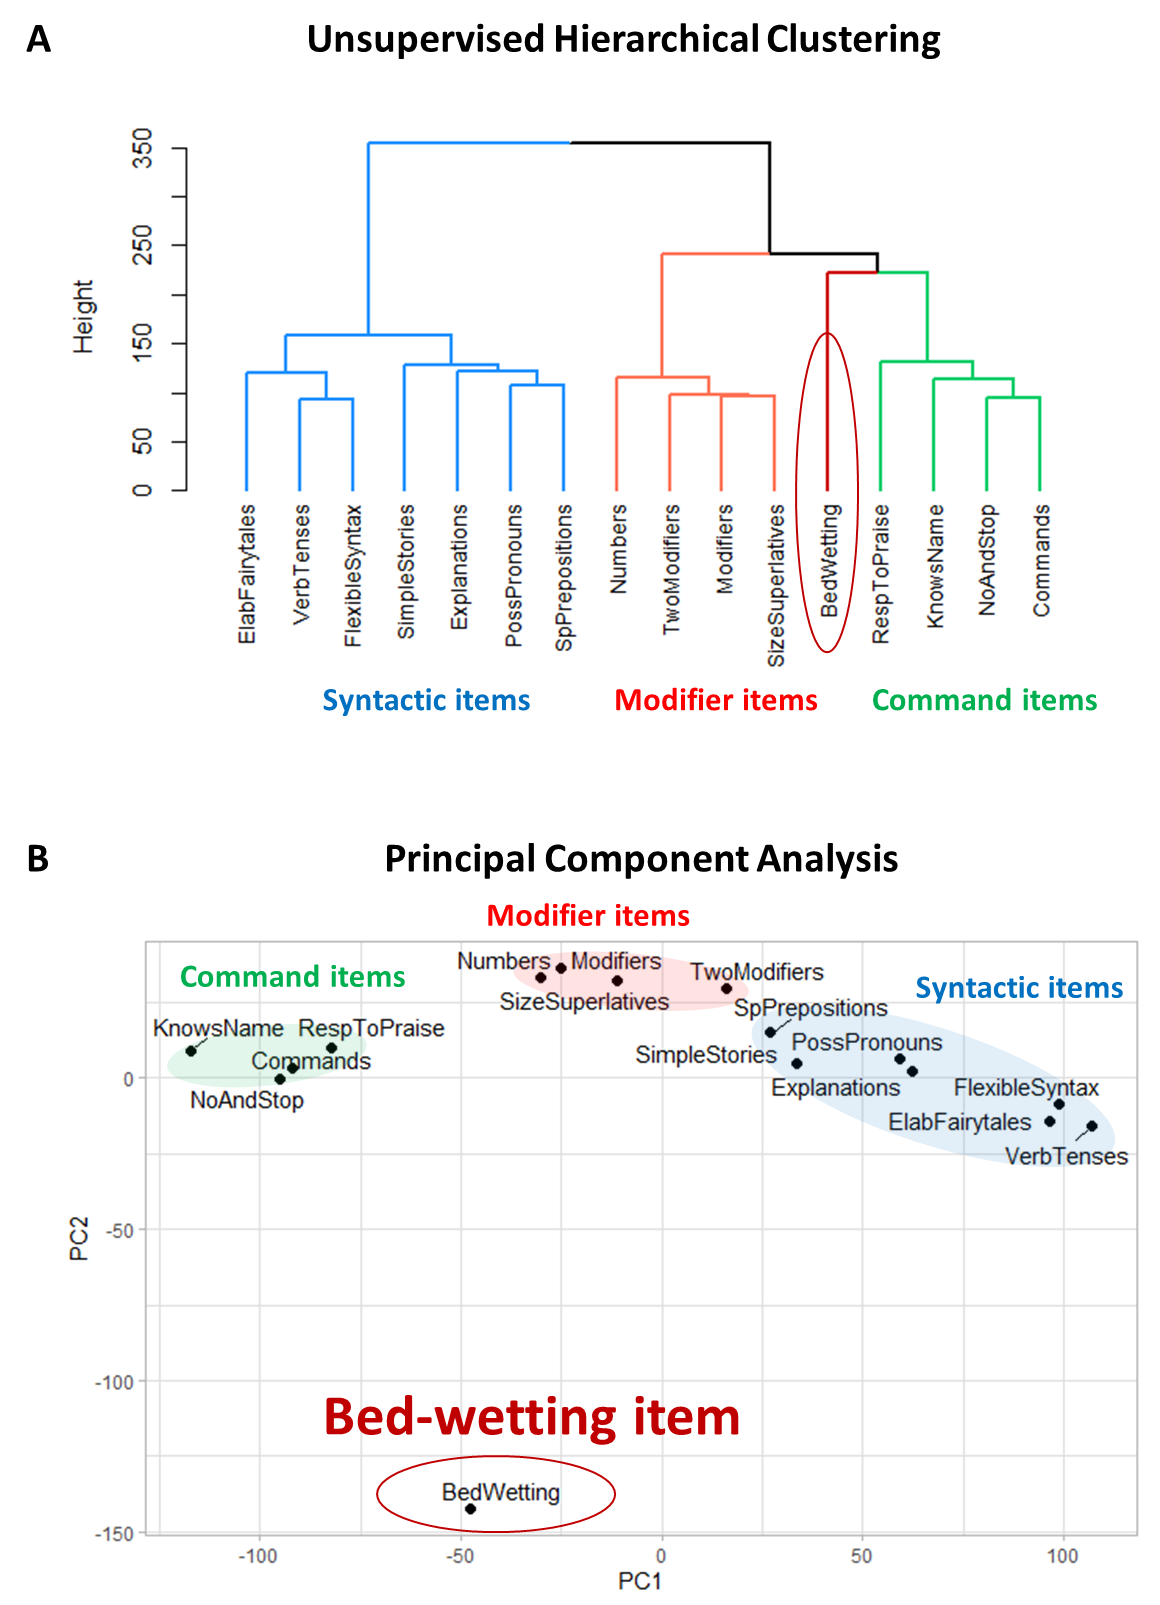

Figure S2. Clustering analysis of 15 language comprehension items with the Bedwetting item (27,187 English-speaking participants, 4 to 22 years of age) (A) The dendrogram representing the hierarchical clustering of language comprehension abilities. (B) Principal component analysis. Principal component 1 accounts for 41.6% of the variance in the data. Principal component 2 accounts for 13% of the variance in the data.


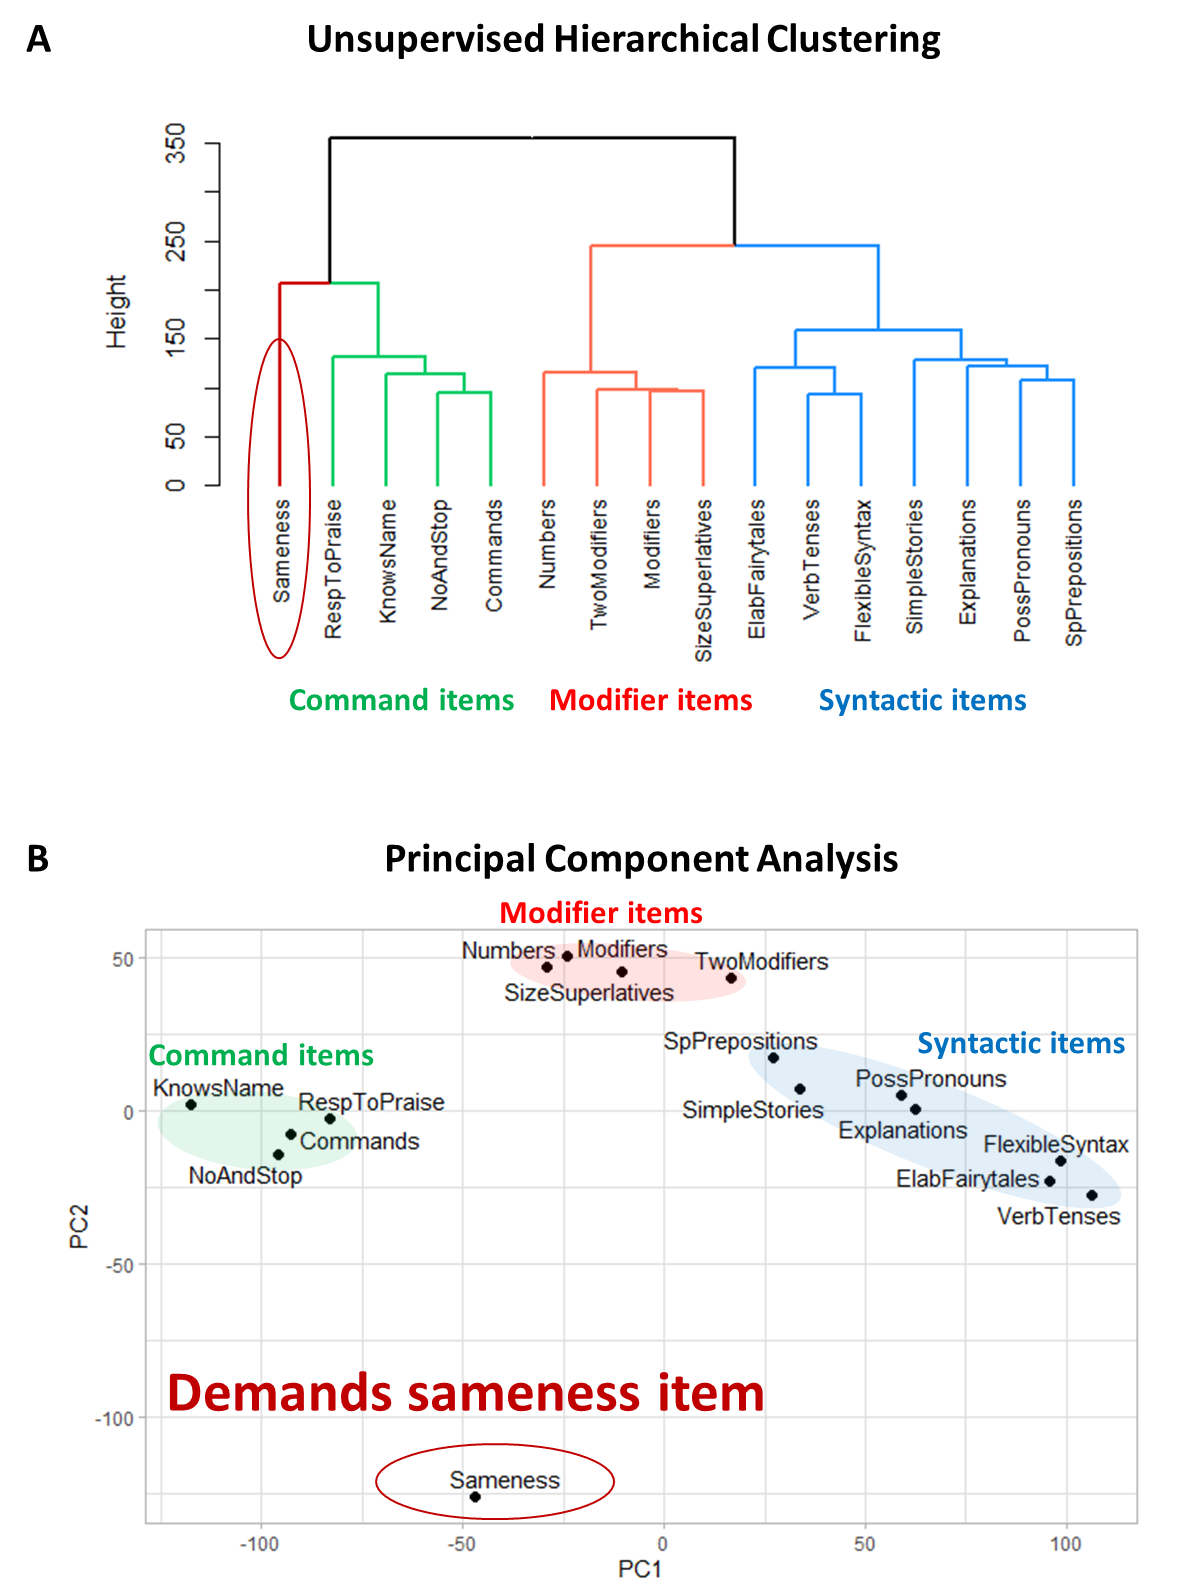


Figure S3. Clustering analysis of 15 language comprehension items with “Demands Sameness” (27,187 English-speaking participants, 4 to 22 years of age) (A) The dendrogram representing the hierarchical clustering of language comprehension abilities. (B) Principal component analysis. Principal component 1 accounts for 42% of the variance in the data. Principal component 2 accounts for 13.7% of the variance in the data.
